# Supplementary material for: Genome-Wide Analysis, Evolutionary History and Response of ALMT Family to Phosphate Starvation in Brassica napus
Source: MDPI journal article supplement (doi:10.3390/ijms22094625), 2021-04-28
Supplement: s1 [file s1]

## Supplementary Files

**Table S1**

| Primer Name   | Sequences (5'-3') Forward Primers | Reverse Primers        |
|---------------|-----------------------------------|------------------------|
| <i>Actin</i>  | ACAGTGTCTGGATCGGTGGTTC            | TGCCTCATCATACTCAGCCTTG |
| BnaC08g13520D | AGCAACGTTTCGTGAGGTTCT             | AGCAACGTTTCGTGAGGTTCT  |
| BnaC08g15170D | ACTTGGACACAGTCTCCAC               | TGTCCCCATACTCTCTGGCT   |
| BnaC05g06110D | TGCAATGTGGGCTGTCAATGA             | GTTGGACCGGACAAACTTGC   |
| BnaC08g13490D | TGCAATGTGGGCTGTCAATGA             | GTTGGACCGGACAAACTTGC   |
| BnaC08g13540D | AATCGACCGTGTCAATCCGAG             | AGTCCACGGAACCTCTCTCCA  |
| BnaA06g04860D | TGCAATGTGGGCTGTCAATGA             | GTTGGACCGGACAAACTTGC   |
| BnaC05g14120D | GTACGTGAGAGTAGGTGGCG              | ACTTTAGCTCCTTCCACGCC   |
| BnaC08g37290D | GGTCGAGGATGAGGAGGAGT              | GCTTCGAAATGGGCGACTAC   |
| BnaA06g12560D | GATCCAGAGCCAGCAATCGA              | GCTAGAGACAGAGCACTCGC   |
| BnaCnng04670D | TCCAGCCTCTTCCTCGATGA              | GGCGAAGTAAACTTTCCGGC   |
| BnaA07g02630D | GGTCCAGAGCAAAGCAGAGA              | AGCCATTCCCCTCTTGACGG   |
| BnaA05g27400D | AGCGAATCTTGCGAGATGGG              | GGTGCCTTAGCGTCAGAGAG   |
| BnaC03g74300D | AGCTTTGGGGTTTCCGGTAT              | TCGAGCAAGGTGTACTGCAC   |
| BnaC05g41520D | GGCGAATCTTGCAAGATGGG              | GGTGCCTTAGCGTCAGAGAG   |
| BnaA01g26740D | CGAAACAGGTATCGTGGCCT              | TCAACTCCTCGAACGCGTAG   |
| BnaA02g20300D | AGCCTAGTCTCAGTCGGAGG              | AAGGCGGTTAAGCTGAGATCC  |
| BnaA03g26740D | GTTGCAACGAACAAACCCGA              | TTCATCCACTGCTTCGACCG   |
| BnaC02g27820D | TGGGACAACCGAGAGATTGG              | GCTTTTGCTGGATCATCTGCC  |
| BnaC02g32490D | CGTCGACGGCAATGTTTTGA              | CTCTTCTCTCCAACCGGTCC   |
| BnaC02g32510D | GTTCTCGAGTTCTCTGCCGG              | TACAGCAGCGCCAATGAAGA   |
| BnaA06g40390D | TTACCGTTTGCTGCCTTTGC              | GACTCGAACCTCCACATCCG   |
| BnaC07g19290D | CGTTACCGTTTGCTGCCTTT              | CGACTACCTCCACATCCGTC   |



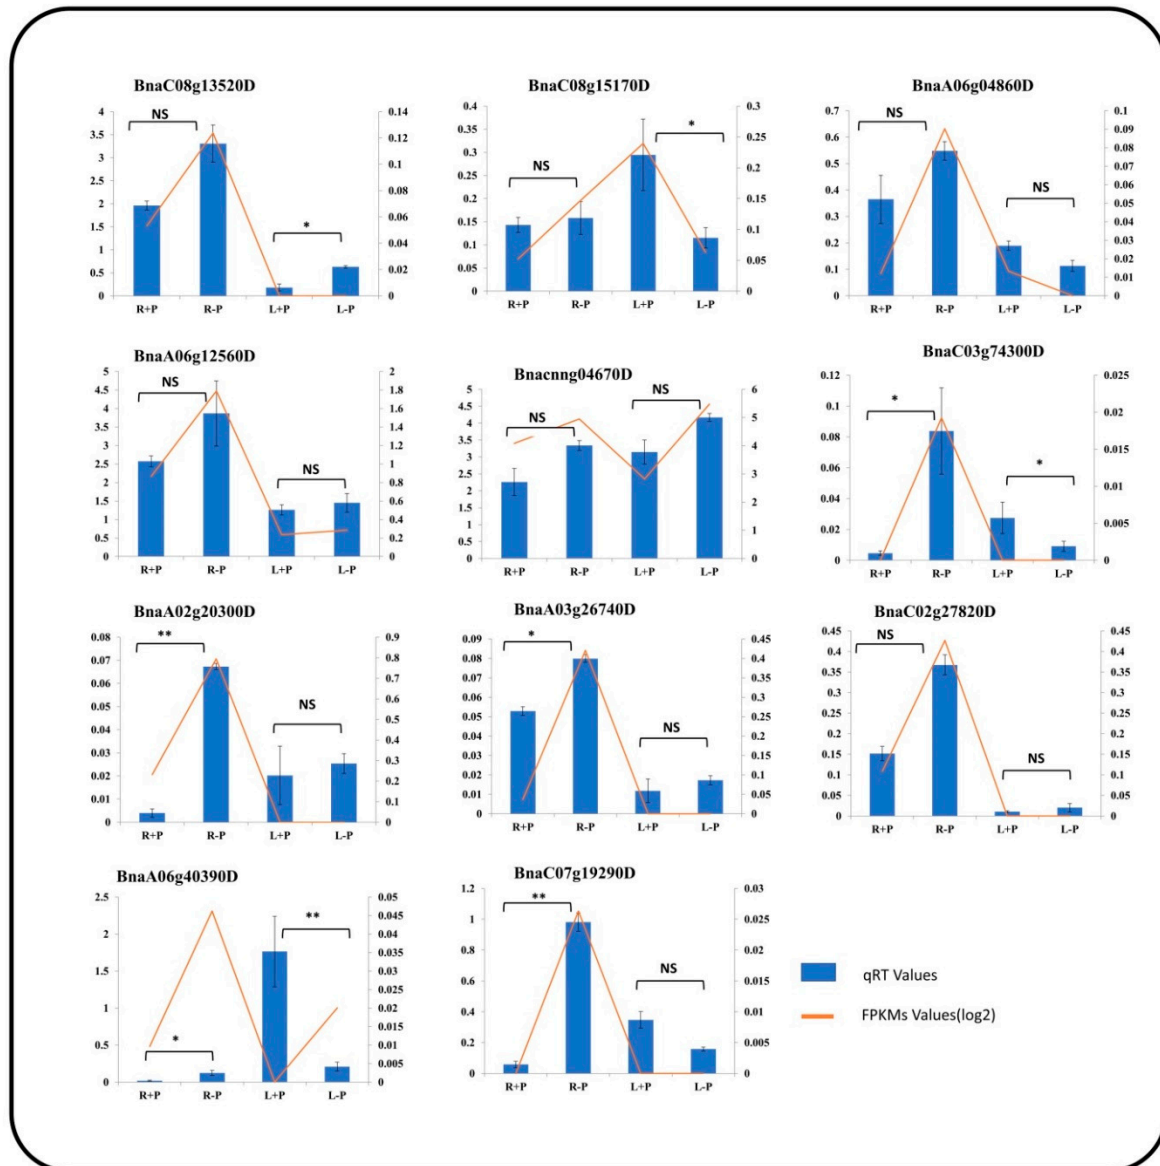

**Figure S2.** Expression patterns of the up-regulated BnaALMTs at a P sufficient supply and a P deficiency supply in Hoagland's solution. The same plants and samples were used for q-PCR measurements with three biological replicates. The relative expression of BnaALMTs in the Brassica napus root and leaf under contrasting P supplies was quantified by q-PCR; The bars represent q-PCR data while the line represents RNA-seq data. Student T-test was applied to treated and non-treated tissues (leaves and roots) to find out the statistical differences caused by phosphorous application in the tissues. ns= non-significant, \*= significant at 0.05, \*\* = significant at 0.01 and \*\*\* = significant at 0.001. All primer sequences are listed in supplementary table S1.
